# Supplementary material for: Exploring the impact of sodium salts on hydrotropic solubilization
Source: Royal Society of Chemistry journal article supplement (doi:10.1039/d3cp02034g), 2023-01-01
Supplement: d3cp02034g1.pdf [file d3cp02034g1.pdf]

## Supplementary Information

### Exploring the impact of sodium salts on the hydrotropic solubilization

Jordana Benfica,<sup>a</sup> Afonso C. Martins,<sup>a</sup> Germán Pérez-Sánchez,<sup>a</sup> Nicolas Schaeffer,<sup>a\*</sup> João A. P. Coutinho<sup>a\*</sup>

<sup>a</sup> CICECO – Aveiro Institute of Materials, Department of Chemistry, University of Aveiro, 3810-193 Aveiro, Portugal.

\* Corresponding E-mail: [nicolas.schaeffer@ua.pt](mailto:nicolas.schaeffer@ua.pt) | [jcoutinho@ua.pt](mailto:jcoutinho@ua.pt)

## TABLES

**Table S1.** Solubility of syringic acid in mixture of 1.0 mol L<sup>-1</sup> of [C<sub>4</sub>mim]Cl with 1.0 mol L<sup>-1</sup> of sodium salts at T = 303.2 K.

| Compounds                                                   | Concentration (mol L <sup>-1</sup> ) | Solubility (g L <sup>-1</sup> ) |
|-------------------------------------------------------------|--------------------------------------|---------------------------------|
| Water                                                       | Pure                                 | 1.48 ± 0.07                     |
| [C <sub>4</sub> mim]Cl                                      | 1.0                                  | 18.08 ± 0.21                    |
| [C <sub>4</sub> min]Cl + Na <sub>2</sub> [SO <sub>4</sub> ] | 1.0                                  | 11.43 ± 0.37                    |
| [C <sub>4</sub> min]Cl + Na[Cl]                             | 1.0                                  | 16.96 ± 1.05                    |
| [C <sub>4</sub> min]Cl + Na[NO <sub>3</sub> ]               | 1.0                                  | 17.31 ± 0.29                    |
| [C <sub>4</sub> min]Cl + Na[SCN]                            | 1.0                                  | 19.38 ± 0.33                    |
| [C <sub>4</sub> min]Cl + Na[TOs]                            | 1.0                                  | 40.03 ± 0.15                    |
| [C <sub>4</sub> min]Cl + Na[N(CN) <sub>2</sub> ]            | 1.0                                  | 43.32 ± 1.98                    |

**Table S2.** Aqueous syringic acid solubility in [C<sub>4</sub>mim]Cl at T = 303.2 K.

| Compounds              | Concentration (mol L <sup>-1</sup> ) | Solubility (g L <sup>-1</sup> ) | ± σ (g L <sup>-1</sup> ) |
|------------------------|--------------------------------------|---------------------------------|--------------------------|
| [C <sub>4</sub> mim]Cl | 0.00                                 | 1.48                            | 0.07                     |
|                        | 0.06                                 | 1.95                            | 0.28                     |
|                        | 0.11                                 | 2.35                            | 0.43                     |
|                        | 0.17                                 | 2.53                            | 0.13                     |
|                        | 0.23                                 | 2.99                            | 0.41                     |
|                        | 0.28                                 | 3.68                            | 0.54                     |
|                        | 0.57                                 | 6.13                            | 0.12                     |
|                        | 1.15                                 | 18.08                           | 0.21                     |
|                        | 1.68                                 | 32.18                           | 0.45                     |
|                        | 2.26                                 | 56.13                           | 0.32                     |
|                        | 2.86                                 | 92.00                           | 0.46                     |
|                        | 3.45                                 | 120.28                          | 0.61                     |
| 4.01                   | 50.60                                | 0.31                            |                          |

**Table S3.** Aqueous syringic acid solubility in o [C<sub>4</sub>mim]Cl the presence of individual salt Na[N(CN)<sub>2</sub>] at 0.5, 1.0, 2.0 mol L<sup>-1</sup> and [C<sub>4</sub>mim][N(CN)<sub>2</sub>] and at T = 303.2 K.

| Compounds                                               | Concentration (mol L <sup>-1</sup> ) | Solubility (g L <sup>-1</sup> ) | ± σ (g L <sup>-1</sup> ) |
|---------------------------------------------------------|--------------------------------------|---------------------------------|--------------------------|
| [C <sub>4</sub> mim][N(CN) <sub>2</sub> ]               | 0.00                                 | 1.48                            | 0.07                     |
|                                                         | 0.05                                 | 4.02                            | 0.51                     |
|                                                         | 0.10                                 | 5.31                            | 0.05                     |
|                                                         | 0.15                                 | 6.96                            | 0.67                     |
|                                                         | 0.19                                 | 8.95                            | 0.72                     |
|                                                         | 0.24                                 | 15.67                           | 0.06                     |
|                                                         | 0.49                                 | 21.12                           | 0.03                     |
|                                                         | 0.98                                 | 31.6                            | 0.30                     |
|                                                         | 1.47                                 | 42.28                           | 0.16                     |
|                                                         | 1.95                                 | 53.88                           | 0.27                     |
|                                                         | 2.44                                 | 51.51                           | 0.23                     |
|                                                         | 2.90                                 | 43.43                           | 0.11                     |
|                                                         | 3.41                                 | 37.65                           | 0.31                     |
|                                                         | 3.90                                 | 31.14                           | 0.34                     |
| [C <sub>4</sub> min][Cl] + Na[N(CN) <sub>2</sub> ] 0.5M | 0.00                                 | 3.87                            | 0.10                     |
|                                                         | 0.58                                 | 15.41                           | 0.10                     |
|                                                         | 1.17                                 | 26.53                           | 0.25                     |
|                                                         | 1.72                                 | 46.03                           | 0.20                     |
|                                                         | 2.30                                 | 70.71                           | 2.86                     |
|                                                         | 2.86                                 | 101.79                          | 4.15                     |
|                                                         | 3.46                                 | 137.03                          | 1.43                     |
|                                                         | 3.98                                 | 76.22                           | 1.80                     |
| [C <sub>4</sub> min][Cl] + Na[N(CN) <sub>2</sub> ] 1M   | 0.00                                 | 7.50                            | 0.20                     |
|                                                         | 0.57                                 | 25.82                           | 0.30                     |
|                                                         | 1.15                                 | 45.52                           | 0.10                     |
|                                                         | 1.72                                 | 73.59                           | 2.89                     |
|                                                         | 2.29                                 | 100.67                          | 3.34                     |
|                                                         | 2.86                                 | 132.54                          | 3.33                     |
|                                                         | 3.44                                 | 140.18                          | 2.70                     |
|                                                         | 4.01                                 | 78.59                           | 1.23                     |
| [C <sub>4</sub> min][Cl] + Na[N(CN) <sub>2</sub> ] 2M   | 0.00                                 | 12.63                           | 0.10                     |
|                                                         | 0.60                                 | 35.96                           | 0.35                     |
|                                                         | 1.18                                 | 59.27                           | 1.43                     |
|                                                         | 1.72                                 | 87.33                           | 0.48                     |
|                                                         | 2.32                                 | 112.76                          | 0.78                     |
|                                                         | 2.90                                 | 138.54                          | 0.56                     |
|                                                         | 3.47                                 | 144.67                          | 1.75                     |
|                                                         | 4.03                                 | 79.83                           | 1.45                     |

**Table S4.** Aqueous syringic acid solubility in o [C<sub>4</sub>mim]Cl the presence of individual salt Na[SCN] at 0.5, 1.0, 2.0 mol L<sup>-1</sup> and [C<sub>4</sub>mim][SCN] and at T = 303.2 K.

| Compounds                               | Concentration (mol L <sup>-1</sup> ) | Solubility (g L <sup>-1</sup> ) | ± σ (g L <sup>-1</sup> ) |
|-----------------------------------------|--------------------------------------|---------------------------------|--------------------------|
| [C <sub>4</sub> mim][SCN]               | 0.00                                 | 1.48                            | 0.07                     |
|                                         | 0.05                                 | 2.10                            | 0.38                     |
|                                         | 0.10                                 | 2.87                            | 0.31                     |
|                                         | 0.15                                 | 3.34                            | 0.33                     |
|                                         | 0.20                                 | 4.97                            | 0.21                     |
|                                         | 0.25                                 | 6.65                            | 0.24                     |
|                                         | 0.50                                 | 7.38                            | 0.09                     |
|                                         | 1.02                                 | 21.41                           | 0.24                     |
|                                         | 1.50                                 | 46.64                           | 0.12                     |
|                                         | 2.03                                 | 72.73                           | 0.11                     |
|                                         | 2.54                                 | 82.60                           | 0.70                     |
|                                         | 3.04                                 | 100.63                          | 0.87                     |
|                                         | 3.55                                 | 118.54                          | 1.37                     |
| 4.07                                    | 115.34                               | 6.28                            |                          |
| [C <sub>4</sub> min][Cl] + Na[SCN] 0.5M | 0.00                                 | 1.82                            | 0.01                     |
|                                         | 0.58                                 | 8.31                            | 0.08                     |
|                                         | 1.17                                 | 17.31                           | 0.18                     |
|                                         | 1.72                                 | 31.48                           | 0.21                     |
|                                         | 2.30                                 | 51.51                           | 1.39                     |
|                                         | 2.86                                 | 75.29                           | 0.87                     |
|                                         | 3.46                                 | 115.89                          | 1.87                     |
| 3.98                                    | 55.67                                | 2.98                            |                          |
| [C <sub>4</sub> min][Cl] + Na[SCN] 1M   | 0.00                                 | 2.14                            | 0.02                     |
|                                         | 0.57                                 | 8.89                            | 0.02                     |
|                                         | 1.15                                 | 19.38                           | 0.33                     |
|                                         | 1.72                                 | 33.26                           | 0.22                     |
|                                         | 2.29                                 | 52.90                           | 0.48                     |
|                                         | 2.86                                 | 75.81                           | 1.56                     |
|                                         | 3.44                                 | 103.59                          | 1.11                     |
| 4.01                                    | 46.62                                | 0.14                            |                          |
| [C <sub>4</sub> min][Cl] + Na[SCN] 2M   | 0.00                                 | 2.42                            | 0.01                     |
|                                         | 0.60                                 | 9.65                            | 0.02                     |
|                                         | 1.18                                 | 20.91                           | 0.03                     |
|                                         | 1.72                                 | 34.84                           | 0.09                     |
|                                         | 2.32                                 | 55.24                           | 0.86                     |
|                                         | 2.90                                 | 75.42                           | 0.73                     |
|                                         | 3.47                                 | 86.64                           | 1.25                     |
| 4.03                                    | 53.62                                | 1.13                            |                          |

**Table S5.** Proton chemical shifts ( $\Delta\delta\text{H}$ ) of the IL cation in a 1.0 mol L<sup>-1</sup> solution of IL [C<sub>4</sub>mim]<sup>+</sup> cationic hydrogens in the various studied systems.

| Systems                                                    | Alkyl |      |      |      | Methyl | Ring |      |      |
|------------------------------------------------------------|-------|------|------|------|--------|------|------|------|
|                                                            | 1     | 2    | 3    | 4    |        | 5    | 6    | 7    |
| [C <sub>4</sub> mim]Cl                                     | 0.73  | 1.15 | 1.67 | 3.79 | 4.04   | 7.29 | 7.34 | 8.60 |
| [C <sub>4</sub> mim]Cl + Na[N(CN) <sub>2</sub> ] 0.5M      | 0.73  | 1.15 | 1.68 | 3.79 | 4.04   | 7.29 | 7.34 | 8.61 |
| [C <sub>4</sub> mim]Cl + Na[N(CN) <sub>2</sub> ] 1M        | 0.73  | 1.15 | 1.67 | 3.79 | 4.04   | 7.29 | 7.34 | 8.61 |
| [C <sub>4</sub> mim]Cl + Na[N(CN) <sub>2</sub> ] 2M        | 0.73  | 1.15 | 1.68 | 3.78 | 4.04   | 7.29 | 7.34 | 8.60 |
| [C <sub>4</sub> mim]Cl + Na[SCN] 0.5M                      | 0.73  | 1.15 | 1.67 | 3.79 | 4.04   | 7.29 | 7.34 | 8.60 |
| [C <sub>4</sub> mim]Cl + Na[SCN] 1M                        | 0.74  | 1.15 | 1.68 | 3.78 | 4.04   | 7.39 | 7.34 | 8.60 |
| [C <sub>4</sub> mim]Cl + Na[SCN] 2M                        | 0.74  | 1.15 | 1.68 | 3.79 | 4.04   | 7.39 | 7.34 | 8.61 |
| [C <sub>4</sub> mim]Cl + Syringic Acid (SA)                | 0.71  | 1.12 | 1.64 | 3.72 | 4.01   | 7.27 | 7.32 | 8.57 |
| [C <sub>4</sub> mim]Cl + SA + Na[N(CN) <sub>2</sub> ] 0.5M | 0.68  | 1.06 | 1.60 | 3.69 | 3.96   | 7.25 | 7.28 | 8.53 |
| [C <sub>4</sub> mim]Cl + SA + Na[N(CN) <sub>2</sub> ] 1M   | 0.67  | 1.06 | 1.60 | 3.69 | 3.95   | 7.24 | 7.27 | 8.52 |
| [C <sub>4</sub> mim]Cl + SA + Na[N(CN) <sub>2</sub> ] 2M   | 0.66  | 1.05 | 1.59 | 3.68 | 3.94   | 7.24 | 7.26 | 8.49 |
| [C <sub>4</sub> mim]Cl + SA + Na[SCN] 0.5M                 | 0.69  | 1.09 | 1.63 | 3.72 | 4.00   | 7.27 | 7.31 | 8.55 |
| [C <sub>4</sub> mim]Cl + SA + Na[SCN] 1M                   | 0.66  | 1.06 | 1.61 | 3.71 | 3.98   | 7.26 | 7.30 | 8.54 |
| [C <sub>4</sub> min]Cl + SA + Na[SCN] 2M                   | 0.61  | 1.02 | 1.58 | 3.71 | 3.96   | 7.25 | 7.29 | 8.53 |

**Table S6.**  $\delta\text{H}$  of the syringic acid hydrogens in the systems studied.

| Systems                                                       | Peak Syringic Acid |      |      |      |      |
|---------------------------------------------------------------|--------------------|------|------|------|------|
|                                                               | 1                  | 2    | 3    | 4    | 5    |
| Syringic Acid in water (SA)                                   | 3.73               | 3.73 | 4.75 | 7.09 | 7.09 |
| [C <sub>4</sub> mim]Cl 1M + SA                                | 3.66               | 3.66 | 4.70 | 6.99 | 6.99 |
| [C <sub>4</sub> mim]Cl 1M + SA + Na[N(CN) <sub>2</sub> ] 0.5M | 3.64               | 3.64 | 4.70 | 6.97 | 6.97 |
| [C <sub>4</sub> mim]Cl 1M + SA + Na[N(CN) <sub>2</sub> ] 1M   | 3.64               | 3.64 | 4.70 | 6.97 | 6.97 |
| [C <sub>4</sub> mim]Cl 1M + SA + Na[N(CN) <sub>2</sub> ] 2M   | 3.63               | 3.63 | 4.70 | 6.96 | 6.96 |
| [C <sub>4</sub> mim]Cl 1M + SA + Na[SCN] 0.5M                 | 3.65               | 3.65 | 4.70 | 6.98 | 6.98 |
| [C <sub>4</sub> mim]Cl 1M + SA + Na[SCN] 1M                   | 3.63               | 3.63 | 4.70 | 6.96 | 6.96 |
| [C <sub>4</sub> mim]Cl 1M + SA + Na[SCN] 2M                   | 3.61               | 3.61 | 4.70 | 6.93 | 6.93 |

**Table S7.** Results of normalization area under the curve for samples used in this work.

| Systems                                | Peak 753 | Peak 2046 | Peak 2060 | Peak 2075 |
|----------------------------------------|----------|-----------|-----------|-----------|
|                                        | Area     | Area      | Peak      | Area      |
| Na[SCN] 0.5M                           | 0.1567   | 0.1400    | 0.2504    | 0.5565    |
| Na[SCN] 1M                             | 0.3202   | 0.2690    | 0.6025    | 0.9740    |
| Na[SCN] 2M                             | 0.7009   | 0.5307    | 2.8150    | 1.1235    |
| C <sub>4</sub> minCl 0.5M + Na[SCN] 2M | 0.4910   | 0.7390    | 1.6150    | 2.3200    |
| C <sub>4</sub> minCl 1M + Na[SCN] 2M   | 0.8098   | 1.1252    | 1.0952    | 2.5048    |
| C <sub>4</sub> minCl 2M + Na[SCN] 2M   | 1.1959   | 1.6843    | 2.1722    | 2.4282    |
| C <sub>4</sub> minCl 3M + Na[SCN] 2M   | 1.3794   | 1.7219    | 3.5755    | 1.9503    |
| C <sub>4</sub> minCl 3.5M + Na[SCN] 2M | 1.3964   | 1.7337    | 3.9688    | 1.2997    |

## FIGURES

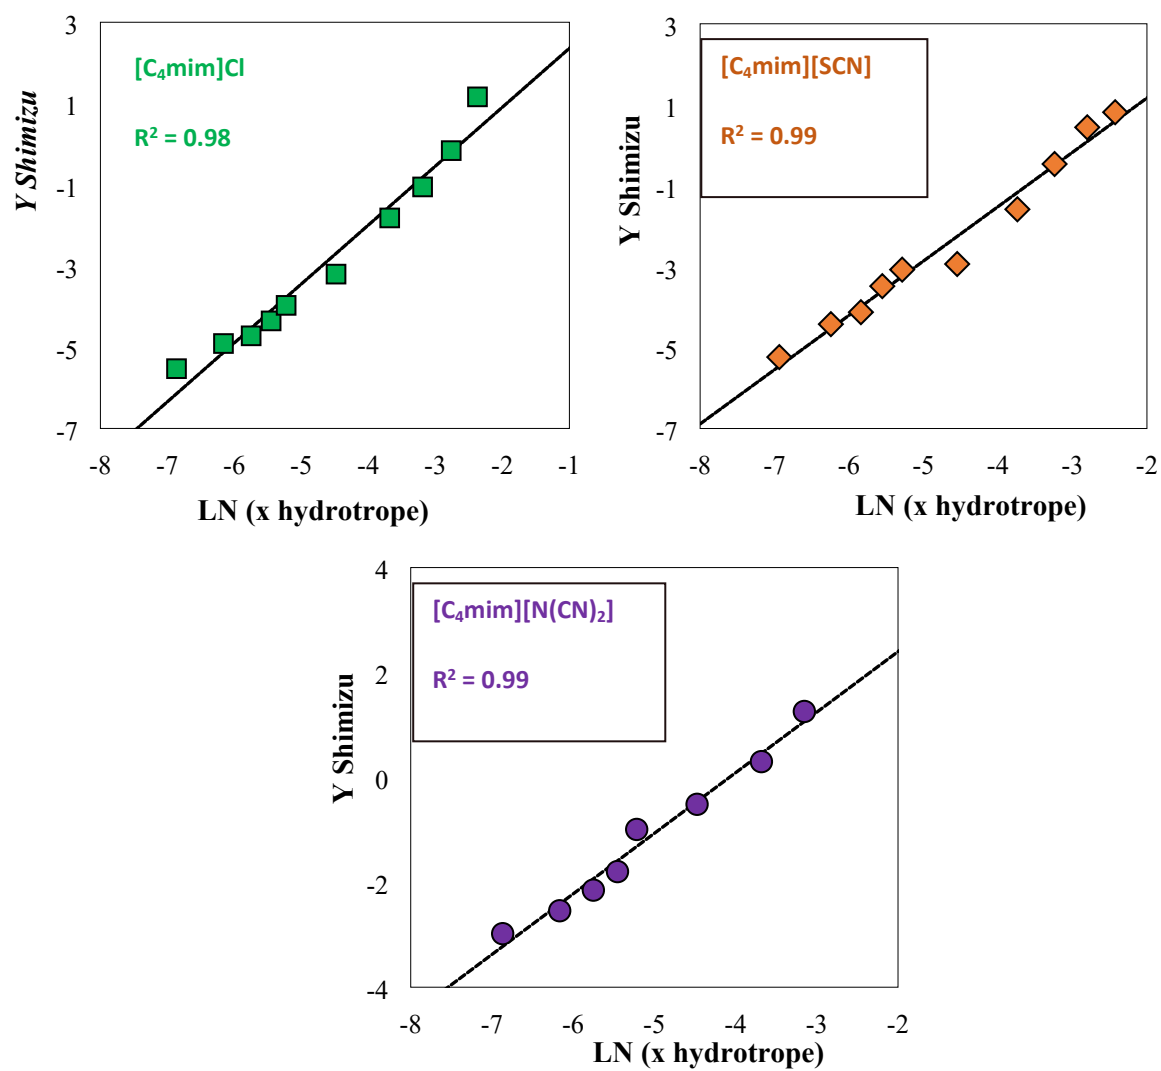

**Figure S1.** Linearized plot of the cooperative hydrotropy model for the ternary IL + Syringic acid +  $\text{H}_2\text{O}$  systems presented in Figure 2 of the manuscript and calculated based on Eq. 5 (experimental data; dashed line, least-squares fit).

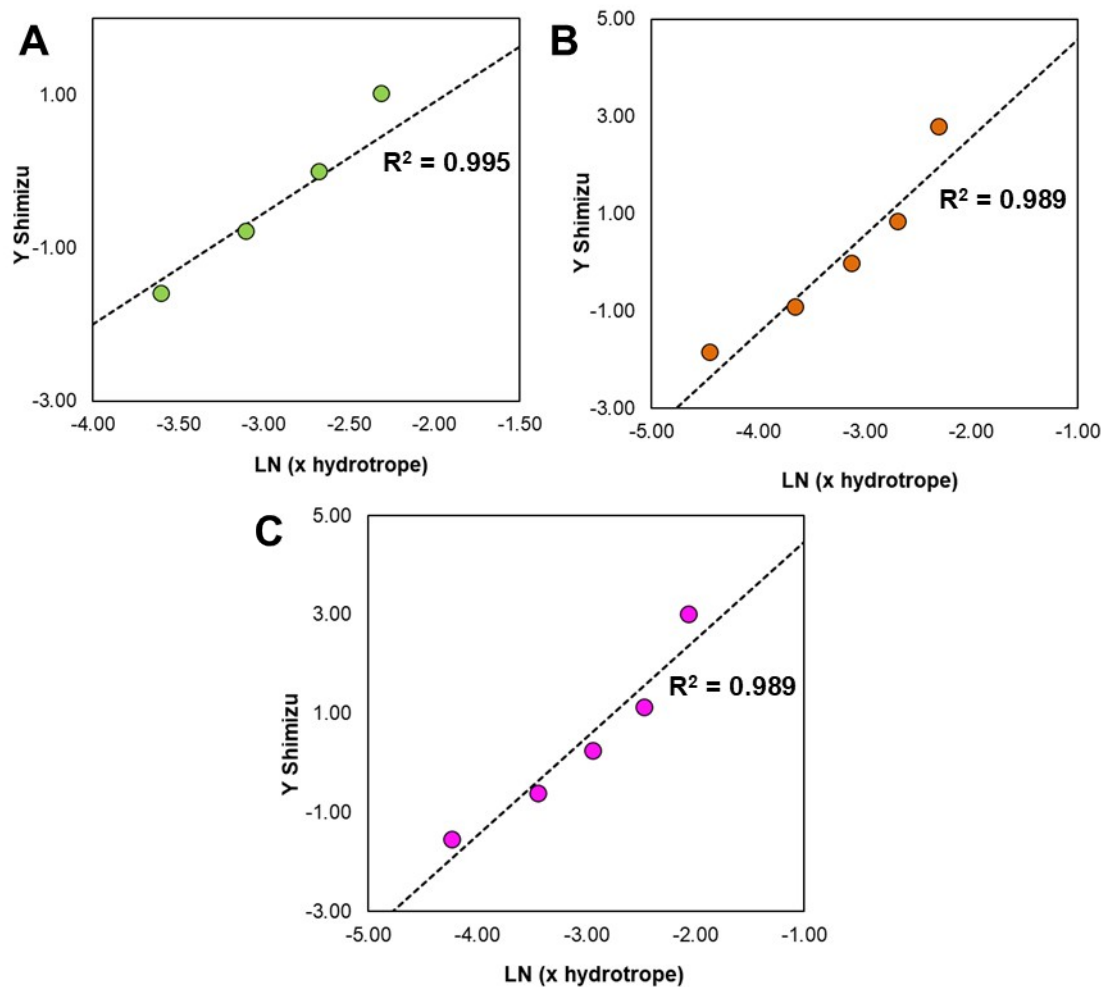

**Figure S2.** Linearized plot of the cooperative hydrotrope model based on Eq 5 by A)  $[C_4mim]Cl + Na[N(CN)_2]$  0.5 mol L<sup>-1</sup>; B)  $[C_4mim]Cl + Na[N(CN)_2]$  1.0 mol L<sup>-1</sup>; and C)  $[C_4mim]Cl + Na[N(CN)_2]$  2.0 mol L<sup>-1</sup> (experimental data; dashed line, least-squares fit).



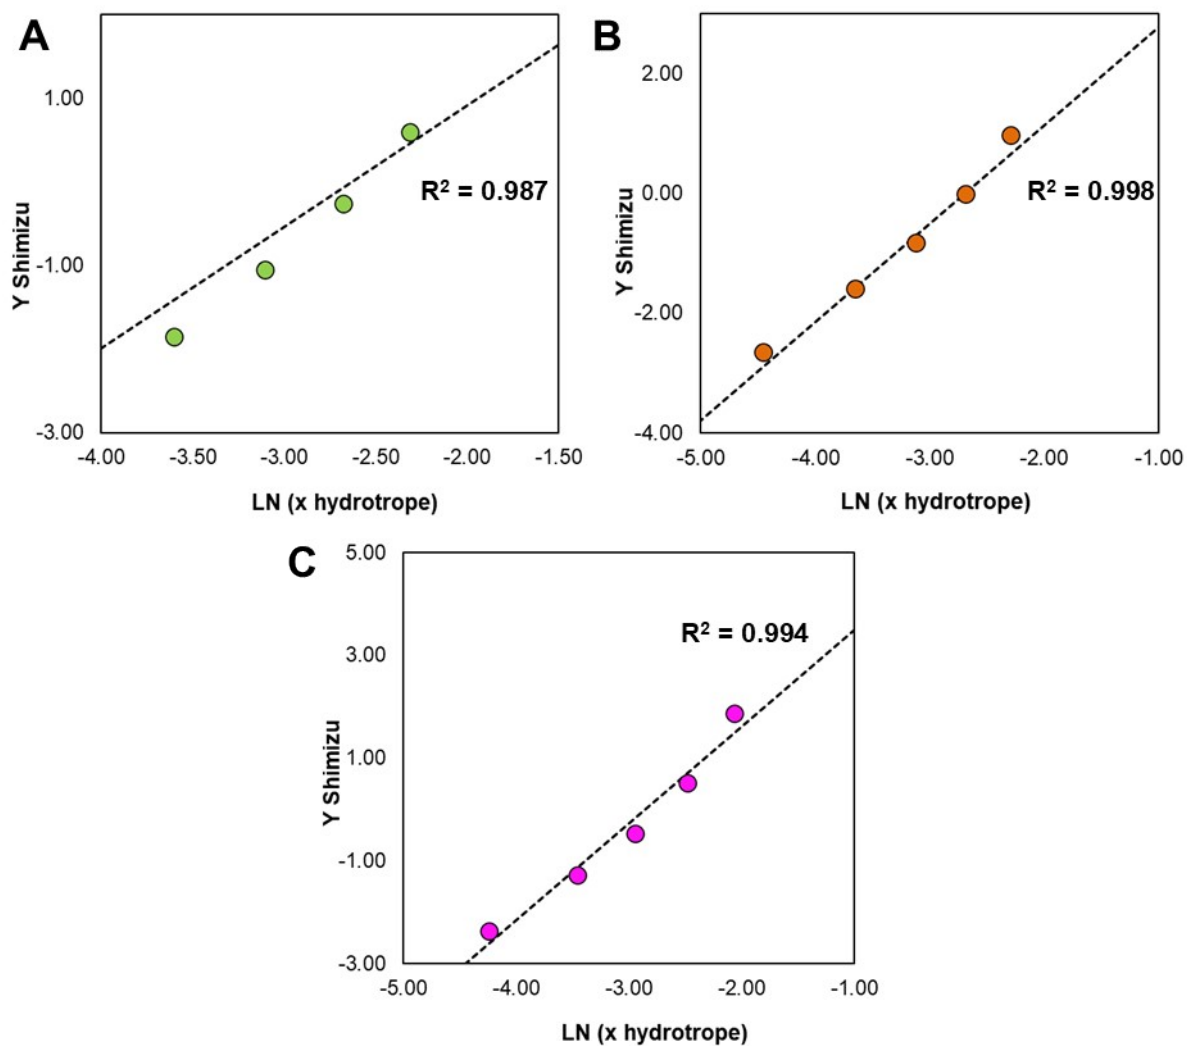

**Figure S3.** Linearized plot of the cooperative hydrotrophy model based on Eq 5 by A)  $[C_4mim]Cl + Na[SCN] 0.5 \text{ mol L}^{-1}$ ; B)  $[C_4mim]Cl + Na[SCN] 1.0 \text{ mol L}^{-1}$ ; and C)  $[C_4mim]Cl + Na[SCN] 2.0 \text{ mol L}^{-1}$  (experimental data; dashed line, least-squares fit).

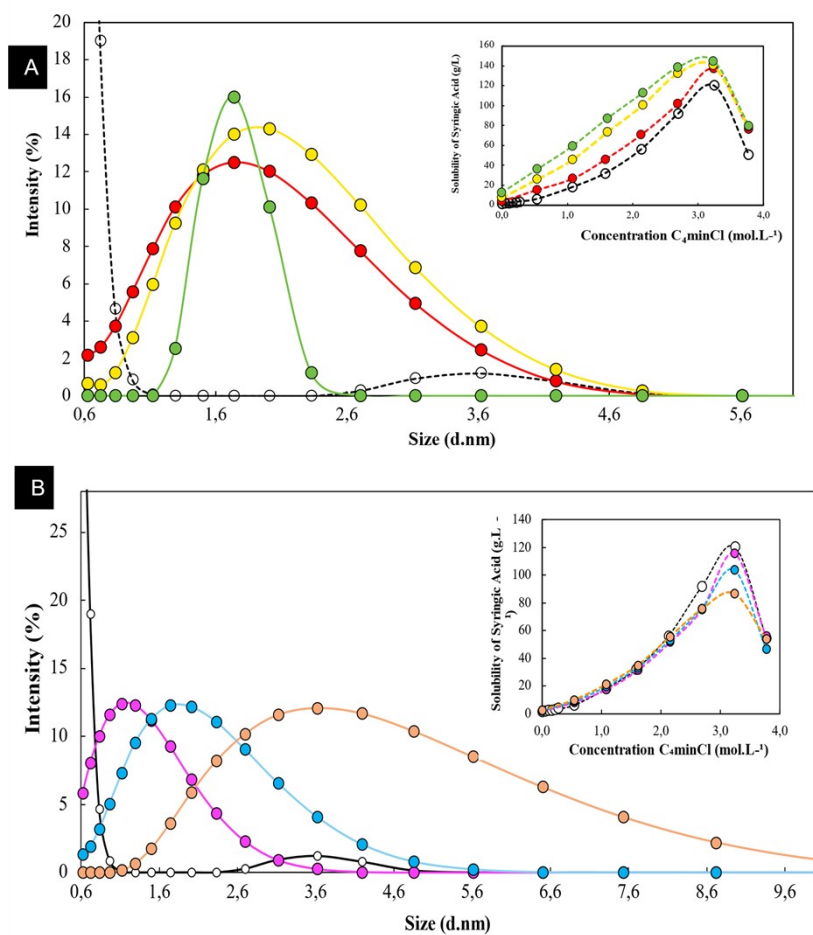

**Figure S4. A)** Aggregate size distribution by intensity obtained by DLS in (●) 1.0 mol L<sup>-1</sup> [C<sub>4</sub>mim]Cl aqueous solutions saturated with syringic acid and doped with (●) 0.5 mol L<sup>-1</sup>, (●) 1.0 mol L<sup>-1</sup> and (●) 2.0 mol L<sup>-1</sup> of Na[N(CN)<sub>2</sub>]. **B)** Aggregate size distribution by intensity obtained by DLS in (●) 1.0 mol L<sup>-1</sup> [C<sub>4</sub>mim]Cl aqueous solutions saturated with syringic acid and doped with (●) 0.5 mol L<sup>-1</sup>, (●) 1.0 mol L<sup>-1</sup> and (●) 2.0 mol L<sup>-1</sup> of Na[SCN].
